# Supplementary material for: Front-Line Tyrosine Kinase Inhibitors in Pediatric Chronic Myeloid Leukemia: A Study on Efficacy and Safety
Source: MDPI journal article supplement (doi:10.3390/cancers15153862), 2023-07-29
Supplement: s1 [file s1]

**Supplementary Table S1.** Comparison of anthropometric profiles of chronic myeloid leukemia patients treated with imatinib and dasatinib

|                | IMAT (n=33) | DSAT (n=18) | <i>P</i> |
|----------------|-------------|-------------|----------|
| Age, years     |             |             |          |
| TKI start      | 12.1±4.09   | 11±5.13     | 0.428    |
| FU 1           | 13.4±4.12   | 11.9±5.18   | 0.285    |
| FU 2           | 14.3±4.1    | 13.4±4.81   | 0.535    |
| Height SDS     |             |             |          |
| TKI start      | 0.14±1.32   | -0.27±0.81  | 0.381    |
| FU 1           | -0.27±1.23  | 0.05±1.02   | 0.297    |
| FU 2           | -0.44±1.14  | -0.48±1.14  | 0.979    |
| Δ Height SDS   |             |             |          |
| TKI start-FU 1 | -0.41±0.63  | -0.22±0.37  | 0.282    |
| FU 1-FU 2      | -0.07±0.23  | -0.27±0.24  | 0.035    |
| TKI start-FU 2 | -0.49±0.79  | -0.51±0.56  | 0.95     |
| Weight SDS     |             |             |          |
| TKI start      | -0.11±1.41  | -0.36±0.73  | 0.877    |
| FU 1           | -0.83±2.24  | -0.04±0.63  | 0.182    |
| FU 2           | 0.03±1.33   | -0.26±0.89  | 0.437    |
| Δ Weight SDS   |             |             |          |
| TKI start-FU 1 | -0.72±2.68  | 0.31±0.43   | 0.138    |
| FU 1-FU 2      | 0.92±2.84   | -0.17±0.32  | 0.22     |
| TKI start-FU 2 | 0.21±0.98   | 0.15±0.33   | 0.81     |
| BMI SDS        |             |             |          |
| TKI start      | -0.23±1.31  | -0.68±0.71  | 0.218    |
| FU 1           | -0.57±3.58  | -0.11±0.59  | 0.612    |
| FU 2           | 0.28±1.27   | -0.04±0.71  | 0.406    |
| Δ BMI SDS      |             |             |          |
| TKI start-FU 1 | -0.34±3.95  | 0.57±0.64   | 0.373    |
| FU 1-FU 2      | 0.86±4.14   | -0.07±0.38  | 0.471    |
| TKI start-FU 2 | 0.55±0.96   | 0.53±0.34   | 0.936    |

All values are expressed as mean ± standard deviation.

BMI, body mass index; DSAT, dasatinib group; FU, follow up; IMAT, imatinib group; SDS, standard deviation score; TKI, tyrosine kinase inhibitor
